# Supplementary material for: Predictors of Bone Mineral Density in Kidney Stone Formers
Source: PubMed Central journal article supplement — Kidney Int Rep. 2021 Dec 15;7(3):558–67. doi: 10.1016/j.ekir.2021.12.003 (PMC8897287; doi:10.1016/j.ekir.2021.12.003), 2021-12-15
Supplement: mmc1.pdf [file mmc1.pdf]

**Supplemental Table 1 | Association of laboratory and kidney stone history parameters as main explanatory variables with Z-scores at the lumbar spine as outcome variable after exclusion of potentially confounding medication intake (calcium and/or vitamin D supplements, thiazide or loop diuretics, and alkali supplements).** Multivariable models are adjusted for the co-variables sex (women versus men), age, BMI, eGFR, and tobacco consumption. The number (N) of participants, unadjusted and adjusted beta coefficients ( $\beta$ ), their 95% confidence intervals (95% CI) and the corresponding p-values are indicated for each model. All continuous explanatory variables in the models were scaled to standard deviation (SD) and every one SD increase in the continuous explanatory variable results in an average increase of the  $\beta$  value in Z-scores at the lumbar spine as outcome variable. Abbreviations: BMI, body mass index; BSA, body surface area; eGFR, estimated glomerular filtration rate.

| Explanatory variable                     | Unadjusted Model |                         |         | Multivariable Model |                         |         |
|------------------------------------------|------------------|-------------------------|---------|---------------------|-------------------------|---------|
|                                          | N                | $\beta$ ;95% CI         | p-value | N                   | $\beta$ ;95% CI         | p-value |
| <b>Blood</b>                             |                  |                         |         |                     |                         |         |
| eGFR, mL/min per 1.73 m <sup>2</sup> BSA | 422              | -0.072;-0.102 to -0.041 | 5.7E-06 | 337                 | -0.042;-0.083 to -0.001 | 0.043   |
| Calcium total, mmol/L                    | 422              | -0.035;-0.066 to -0.004 | 0.026   | 337                 | -0.016;-0.05-0.018      | 0.36    |
| Phosphate, mmol/L                        | 420              | 0.012;-0.019-0.043      | 0.46    | 337                 | 0.002;-0.03-0.033       | 0.92    |
| Magnesium, mmol/L                        | 418              | -0.019;-0.05-0.012      | 0.24    | 335                 | -0.018;-0.048-0.012     | 0.24    |
| Uric acid, $\mu$ mol/L                   | 420              | 0.013;-0.018-0.045      | 0.40    | 335                 | 0.016;-0.013-0.045      | 0.28    |
| Bicarbonate, mmol/L                      | 412              | -0.034;-0.065 to -0.003 | 0.032   | 330                 | 0.007;-0.026-0.041      | 0.67    |
| Glucose, mmol/L                          | 411              | 0.014;-0.017-0.046      | 0.37    | 330                 | 0;-0.031-0.031          | 0.99    |
| Alkaline phosphatase, IU/mL              | 421              | -0.028;-0.06-0.003      | 0.080   | 336                 | -0.031;-0.063-0.002     | 0.062   |
| PTH, pg/mL                               | 421              | -0.024;-0.055-0.007     | 0.12    | 336                 | -0.031;-0.063-0         | 0.048   |
| 25-OH-Vitamin D <sub>3</sub> , ng/mL     | 263              | 0.022;-0.019-0.063      | 0.29    | 200                 | 0.028;-0.016-0.072      | 0.21    |
| 1,25-OH-Vitamin D <sub>3</sub> , pg/mL   | 416              | -0.039;-0.07 to -0.008  | 0.013   | 332                 | -0.008;-0.04-0.024      | 0.61    |
| <b>Urine</b>                             |                  |                         |         |                     |                         |         |
| Sodium, mmol/24 h                        | 408              | -0.002;-0.034-0.029     | 0.88    |                     |                         |         |
| Sodium, mmol/24 h – restricted diet      | 408              | -0.002;-0.034-0.029     | 0.88    | 324                 | 0.023;-0.012-0.058      | 0.20    |
| Sodium, mmol/24 h – restricted diet      | 354              | -0.02;-0.055-0.016      | 0.27    | 286                 | 0.009;-0.027-0.044      | 0.64    |
| Potassium, mmol/24 h                     | 407              | 0.032;0-0.063           | 0.050   | 323                 | 0.031;-0.004-0.066      | 0.081   |
| Calcium, mmol/24 h                       | 406              | -0.029;-0.061-0.003     | 0.073   | 324                 | 0;-0.034-0.034          | 0.98    |
| Calcium, mmol/24 h – restricted diet     | 358              | -0.044;-0.079 to -0.009 | 0.013   | 289                 | -0.013;-0.05-0.023      | 0.47    |
| Phosphate, mmol/24 h                     | 406              | -0.016;-0.048-0.016     | 0.34    | 324                 | 0.02;-0.016-0.057       | 0.28    |
| Magnesium, mmol/24 h                     | 406              | -0.01;-0.042-0.022      | 0.53    | 324                 | 0.008;-0.024-0.041      | 0.62    |

|                                                                  |     |                         |         |     |                         |        |
|------------------------------------------------------------------|-----|-------------------------|---------|-----|-------------------------|--------|
| Uric acid, $\mu\text{mol}/24\text{ h}$                           | 406 | -0.018;-0.05-0.014      | 0.28    | 324 | 0.022;-0.016-0.06       | 0.25   |
| Urea, $\text{mmol}/24\text{ h}$                                  | 406 | 0.006;-0.026-0.038      | 0.71    | 323 | 0.035;-0.002-0.071      | 0.061  |
| Citrate, $\text{mmol}/24\text{ h}$                               | 404 | 0.029;-0.003-0.06       | 0.077   | 322 | 0.013;-0.018-0.045      | 0.41   |
| Oxalate, $\text{mmol}/24\text{ h}$                               | 404 | -0.018;-0.049-0.014     | 0.27    | 322 | -0.014;-0.043-0.015     | 0.33   |
| Sulfate, $\text{mmol}/24\text{ h}$                               | 397 | -0.009;-0.042-0.023     | 0.57    | 317 | 0.048;-0.046-0.142      | 0.32   |
| NGIA, $\text{mmol}/24\text{ h}$                                  | 370 | 0.041;0.007-0.074       | 0.017   | 297 | 0.035;-0.005-0.075      | 0.086  |
| pH, 24 h                                                         | 393 | -0.039;-0.071 to -0.006 | 0.019   | 312 | -0.004;-0.038-0.03      | 0.81   |
| Fasting calcium/creatinine, $\text{mmol}/\text{mmol}$            | 394 | -0.053;-0.084 to -0.021 | 0.0013  | 314 | -0.032;-0.064-0.001     | 0.055  |
| Post-load calcium/creatinine, $\text{mmol}/\text{mmol}$          | 396 | -0.075;-0.106 to -0.045 | 2.3E-06 | 315 | -0.058;-0.1 to -0.016   | 0.0065 |
| $\Delta\text{Ca}$ : post-load—fasting, $\text{mmol}/\text{mmol}$ | 347 | -0.073;-0.105 to -0.041 | 1.1E-05 | 279 | -0.053;-0.09 to -0.016  | 0.0046 |
| <b>Kidney stone history and composition</b>                      |     |                         |         |     |                         |        |
| Age at first stone event, y                                      | 404 | 0.056;0.024-0.087       | 5.5E-04 | 321 | -0.001;-0.044-0.042     | 0.96   |
| Number of stone events                                           | 426 | 0.021;-0.01-0.052       | 0.18    | 337 | 0.012;-0.017-0.04       | 0.42   |
| Recurrent stone former (yes)                                     | 426 | 0.017;-0.014-0.048      | 0.28    | 337 | 0.026;-0.006-0.059      | 0.11   |
| Calcium oxalate monohydrate content, %                           | 333 | 0.026;-0.008-0.06       | 0.13    | 268 | 0.012;-0.023-0.046      | 0.51   |
| Calcium oxalate dihydrate content, %                             | 333 | -0.058;-0.091 to -0.024 | 8.9E-04 | 268 | -0.047;-0.081 to -0.013 | 0.0064 |
| Apatite, %                                                       | 333 | 0.013;-0.022-0.047      | 0.47    | 268 | 0.013;-0.026-0.051      | 0.52   |

**Supplemental Table 2 | Association of laboratory and kidney stone history parameters as main explanatory variables with Z-scores at the femoral neck as outcome variable after exclusion of potentially confounding medication intake (calcium and/or vitamin D supplements, thiazide or loop diuretics, and alkali supplements).** Multivariable models are adjusted for the co-variables sex (women versus men), age, BMI, eGFR, and tobacco consumption. The number (N) of participants, unadjusted and adjusted beta coefficients ( $\beta$ ), their 95% confidence intervals (95% CI) and the corresponding p-values are indicated for each model. All continuous explanatory variables in the models were scaled to standard deviation (SD) and every one SD increase in the continuous explanatory variable results in an average increase of the  $\beta$  value in Z-scores at the femoral neck as outcome variable. Abbreviations: BMI, body mass index; BSA, body surface area; eGFR, estimated glomerular filtration rate.

| Explanatory variable                     | Unadjusted Model |                     |         | Multivariable Model |                         |         |
|------------------------------------------|------------------|---------------------|---------|---------------------|-------------------------|---------|
|                                          | N                | $\beta$ ; 95% CI    | p-value | N                   | $\beta$ ; 95% CI        | p-value |
| <b>Blood</b>                             |                  |                     |         |                     |                         |         |
| eGFR, mL/min per 1.73 m <sup>2</sup> BSA | 422              | -0.02;-0.043-0.002  | 0.076   | 336                 | 0.009;-0.023-0.041      | 0.59    |
| Calcium total, mmol/L                    | 422              | -0.016;-0.038-0.007 | 0.18    | 336                 | -0.013;-0.039-0.014     | 0.34    |
| Phosphate, mmol/L                        | 420              | 0.01;-0.012-0.033   | 0.36    | 336                 | 0.012;-0.012-0.037      | 0.33    |
| Magnesium, mmol/L                        | 418              | 0.005;-0.018-0.028  | 0.67    | 334                 | 0;-0.024-0.024          | 1.00    |
| Uric acid, $\mu$ mol/L                   | 421              | -0.001;-0.024-0.021 | 0.93    | 335                 | -0.002;-0.025-0.02      | 0.84    |
| Bicarbonate, mmol/L                      | 411              | -0.007;-0.029-0.016 | 0.55    | 328                 | 0.02;-0.006-0.046       | 0.13    |
| Glucose, mmol/L                          | 411              | 0.022;-0.001-0.044  | 0.059   | 329                 | 0.006;-0.018-0.03       | 0.62    |
| Alkaline phosphatase, IU/mL              | 422              | -0.017;-0.039-0.006 | 0.15    | 336                 | -0.034;-0.059 to -0.01  | 0.0066  |
| PTH, pg/mL                               | 421              | -0.019;-0.041-0.004 | 0.10    | 335                 | -0.027;-0.051 to -0.002 | 0.032   |
| 25-OH-Vitamin D <sub>3</sub> , ng/mL     | 264              | 0.025;-0.005-0.055  | 0.10    | 200                 | 0.027;-0.01-0.065       | 0.15    |
| 1,25-OH-Vitamin D <sub>3</sub> , pg/mL   | 416              | -0.022;-0.044-0.001 | 0.062   | 331                 | -0.005;-0.03-0.021      | 0.71    |
| <b>Urine</b>                             |                  |                     |         |                     |                         |         |
| Sodium, mmol/24 h                        | 408              | 0.021;-0.002-0.045  | 0.068   | 323                 | 0.02;-0.008-0.048       | 0.16    |
| Sodium, mmol/24 h – restricted diet      | 354              | 0.014;-0.011-0.038  | 0.28    | 285                 | 0.009;-0.018-0.036      | 0.52    |
| Potassium, mmol/24 h                     | 407              | 0.047;0.024-0.07    | 6.0E-05 | 322                 | 0.043;0.016-0.071       | 0.0020  |
| Calcium, mmol/24 h                       | 406              | 0.028;0.005-0.051   | 0.016   | 323                 | 0.034;0.007-0.06        | 0.013   |
| Calcium, mmol/24 h – restricted diet     | 358              | 0.024;0-0.048       | 0.052   | 288                 | 0.023;-0.005-0.05       | 0.11    |
| Phosphate, mmol/24 h                     | 406              | 0.027;0.004-0.05    | 0.021   | 323                 | 0.026;-0.003-0.056      | 0.077   |
| Magnesium, mmol/24 h                     | 406              | 0.032;0.008-0.055   | 0.0075  | 323                 | 0.041;0.015-0.066       | 0.0018  |

|                                                                  |     |                         |         |     |                     |       |
|------------------------------------------------------------------|-----|-------------------------|---------|-----|---------------------|-------|
| Uric acid, $\mu\text{mol}/24\text{ h}$                           | 406 | 0.022;-0.001-0.045      | 0.063   | 323 | 0.03;0-0.059        | 0.052 |
| Urea, $\text{mmol}/24\text{ h}$                                  | 406 | 0.04;0.017-0.063        | 6.6E-04 | 322 | 0.038;0.009-0.067   | 0.010 |
| Citrate, $\text{mmol}/24\text{ h}$                               | 404 | 0.034;0.011-0.058       | 0.0043  | 321 | 0.023;-0.003-0.049  | 0.079 |
| Oxalate, $\text{mmol}/24\text{ h}$                               | 404 | -0.003;-0.027-0.02      | 0.78    | 321 | -0.005;-0.028-0.017 | 0.64  |
| Sulfate, $\text{mmol}/24\text{ h}$                               | 397 | 0.011;-0.013-0.035      | 0.36    | 316 | 0.061;-0.014-0.135  | 0.11  |
| NGIA, $\text{mmol}/24\text{ h}$                                  | 371 | 0.03;0.006-0.055        | 0.016   | 297 | 0.034;0.002-0.065   | 0.039 |
| pH, 24 h                                                         | 394 | -0.015;-0.039-0.008     | 0.20    | 312 | 0.01;-0.016-0.036   | 0.46  |
| Fasting calcium/creatinine, $\text{mmol}/\text{mmol}$            | 392 | -0.004;-0.028-0.019     | 0.72    | 311 | -0.006;-0.031-0.019 | 0.63  |
| Post-load calcium/creatinine, $\text{mmol}/\text{mmol}$          | 395 | -0.017;-0.04-0.005      | 0.13    | 313 | -0.018;-0.049-0.014 | 0.27  |
| $\Delta\text{Ca}$ : post-load—fasting, $\text{mmol}/\text{mmol}$ | 347 | -0.029;-0.053 to -0.005 | 0.019   | 278 | -0.009;-0.037-0.02  | 0.56  |
| <b>Kidney stone history and composition</b>                      |     |                         |         |     |                     |       |
| Age at first stone event, y                                      | 404 | 0.018;-0.005-0.041      | 0.12    | 320 | -0.015;-0.049-0.019 | 0.39  |
| Number of stone events                                           | 426 | 0.012;-0.01-0.035       | 0.27    | 336 | 0.01;-0.013-0.032   | 0.39  |
| Recurrent stone former (yes)                                     | 426 | 0.002;-0.02-0.024       | 0.86    | 336 | 0.006;-0.019-0.031  | 0.64  |
| Calcium oxalate monohydrate content, %                           | 332 | -0.004;-0.03-0.022      | 0.78    | 266 | -0.012;-0.041-0.016 | 0.39  |
| Calcium oxalate dihydrate content, %                             | 332 | -0.012;-0.038-0.013     | 0.35    | 266 | -0.016;-0.044-0.012 | 0.25  |
| Apatite content, %                                               | 332 | 0.01;-0.016-0.035       | 0.46    | 266 | 0.018;-0.013-0.049  | 0.25  |

## Modified STROBE Statement—checklist of items that should be included in reports of observational studies (Cohort/Cross-sectional and case-control studies)

|                           | Item No | Recommendation                                                                                                                                                                                                                                                                                                                                                                                                               |
|---------------------------|---------|------------------------------------------------------------------------------------------------------------------------------------------------------------------------------------------------------------------------------------------------------------------------------------------------------------------------------------------------------------------------------------------------------------------------------|
| <b>Title and abstract</b> | 1       | <p>(a) Indicate the study’s design with a commonly used term in the title or the abstract.</p> <p><b>Page 2 of manuscript (Abstract)</b></p> <hr/> <p>(b) Provide in the abstract an informative and balanced summary of what was done and what was found</p> <p><b>Page 2 of manuscript (Abstract)</b></p>                                                                                                                  |
| <b>Introduction</b>       |         |                                                                                                                                                                                                                                                                                                                                                                                                                              |
| Background/rationale      | 2       | <p>Explain the scientific background and rationale for the investigation being reported</p> <p><b>Pages 4 and 5 of manuscript (Introduction)</b></p>                                                                                                                                                                                                                                                                         |
| Objectives                | 3       | <p>State specific objectives, including any prespecified hypotheses</p> <p><b>Page 5 of manuscript (Introduction)</b></p>                                                                                                                                                                                                                                                                                                    |
| <b>Methods</b>            |         |                                                                                                                                                                                                                                                                                                                                                                                                                              |
| Study design              | 4       | <p>Present key elements of study design early in the paper</p> <p><b>Page 2 of manuscript (Abstract)</b></p> <p><b>Pages 6 - 8 of manuscript (Methods)</b></p>                                                                                                                                                                                                                                                               |
| Setting                   | 5       | <p>Describe the setting, locations, and relevant dates, including periods of recruitment, exposure, follow-up, and data collection</p> <p><b>Pages 4 – 6 of manuscript (Methods)</b></p>                                                                                                                                                                                                                                     |
| Participants              | 6       | <p>(a) <i>Cohort study</i>—Give the eligibility criteria, and the sources and methods of selection of participants. Describe methods of follow-up</p> <p><b>Pages 6 and 7 of manuscript (Methods)</b></p> <p><i>Case-control study</i>—Give the eligibility criteria, and the sources and methods of case ascertainment and control selection. Give the rationale for the choice of cases and controls</p> <p><b>N/A</b></p> |

*Cross-sectional study*—Give the eligibility criteria, and the sources and methods of selection of participants

**N/A**

---

|                              |    |                                                                                                                                          |
|------------------------------|----|------------------------------------------------------------------------------------------------------------------------------------------|
| Variables                    | 7  | Clearly define all outcomes, exposures, predictors, potential confounders, and effect modifiers. Give diagnostic criteria, if applicable |
|                              |    | <b>Pages 6 – 8 of manuscript (Methods)</b>                                                                                               |
|                              |    | <b>Tables 2-4, Supplemental Tables 1 and 2</b>                                                                                           |
| Data sources/<br>measurement | 8* | For each variable of interest, give sources of data and details of methods of assessment (measurement).                                  |
|                              |    | <b>Pages 6 – 8 of manuscript (Methods)</b>                                                                                               |
| Bias                         | 9  | Describe any efforts to address potential sources of bias                                                                                |
|                              |    | <b>Pages 6 – 8 of manuscript (Methods)</b>                                                                                               |
| Study size                   | 10 | Explain how the study size was arrived at (if applicable)                                                                                |
|                              |    | <b>N/A</b>                                                                                                                               |
| Quantitative<br>variables    | 11 | Explain how quantitative variables were handled in the analyses. If applicable, describe which groupings were chosen and why             |
|                              |    | <b>Pages 6 – 8 of manuscript (Methods)</b>                                                                                               |
| Statistical methods          | 12 | (a) Describe all statistical methods, including those used to control for confounding                                                    |
|                              |    | <b>Page 8 of manuscript (Methods)</b>                                                                                                    |
|                              |    | (b) Describe any methods used to examine subgroups and interactions                                                                      |
|                              |    | <b>Page 8 of manuscript (Methods)</b>                                                                                                    |
|                              |    | (c) Explain how missing data were addressed                                                                                              |
|                              |    | <b>Pages 26 - 29 of manuscript (Tables). Number of individual patients and number of observations indicated.</b>                         |
|                              |    | (d) <i>Cohort study</i> —If applicable, explain how loss to follow-up was addressed                                                      |
|                              |    | <b>N/A</b>                                                                                                                               |
|                              |    | <i>Case-control study</i> —If applicable, explain how matching of cases and controls was addressed                                       |

*Cross-sectional study*—If applicable, describe analytical methods taking account of sampling strategy

---

(e) Describe any sensitivity analyses

**Supplemental Tables 1 and 2, Pages 12(Results section) and 13-15 (Discussion section)**

---

**Results**

Participants

13\*

(a) Report numbers of individuals at each stage of study—eg numbers potentially eligible, examined for eligibility, confirmed eligible, included in the study, completing follow-up, and analyzed

**Tables 1-4**

---

(c) **Use of a flow diagram**

**Not done, but described in detail in Methods section.**

---

Descriptive data

14\*

(a) Give characteristics of study participants (eg demographic, clinical, social) and information on exposures and potential confounders

**Table 1**

---

(b) Indicate number of participants with missing data for each variable of interest

**Tables 1-4**

---

(c) *Cohort study*—Summarise follow-up time (eg, average and total amount)

**N/A**

---

Outcome data

15\*

*Cohort study*—Report numbers of outcome events or summary measures over time

**Tables 1-4**

---

*Case-control study*—Report numbers in each exposure category, or summary measures of exposure

**N/A**

---

*Cross-sectional study*—Report numbers of outcome events or summary measures

**N/A**

|                   |    |                                                                                                                                                                                                              |
|-------------------|----|--------------------------------------------------------------------------------------------------------------------------------------------------------------------------------------------------------------|
| Main results      | 16 | (a) Give unadjusted estimates and, if applicable, confounder-adjusted estimates and their precision (eg, 95% confidence interval). Make clear which confounders were adjusted for and why they were included |
|                   |    | <b>Tables 3 and 4</b>                                                                                                                                                                                        |
| Other analyses    | 17 | Report other analyses done—eg analyses of subgroups and interactions, and sensitivity analyses                                                                                                               |
|                   |    | <b>Tables 2 – 4, Supplemental Tables 1 and 2</b>                                                                                                                                                             |
| <b>Discussion</b> |    |                                                                                                                                                                                                              |
| Key results       | 18 | Summarise key results with reference to study objectives                                                                                                                                                     |
|                   |    | <b>Pages 13 – 15 (Discussion)</b>                                                                                                                                                                            |
| Limitations       | 19 | Discuss limitations of the study, taking into account sources of potential bias or imprecision. Discuss both direction and magnitude of any potential bias                                                   |
|                   |    | <b>Pages 13 – 15 (Discussion)</b>                                                                                                                                                                            |
| Interpretation    | 20 | Give a cautious overall interpretation of results considering objectives, limitations, multiplicity of analyses, results from similar studies, and other relevant evidence                                   |
|                   |    | <b>Pages 13 – 15 (Discussion)</b>                                                                                                                                                                            |
| Generalisability  | 21 | Discuss the generalisability (external validity) of the study results                                                                                                                                        |
|                   |    | <b>Pages 13 – 15 (Discussion)</b>                                                                                                                                                                            |

\*Give information separately for cases and controls in case-control studies and, if applicable, for exposed and unexposed groups in cohort and cross-sectional studies.

**Note:** An Explanation and Elaboration article discusses each checklist item and gives methodological background and published examples of transparent reporting. The STROBE checklist is best used in conjunction with this article (freely available on the Web sites of PLoS Medicine at <http://www.plosmedicine.org/>, Annals of Internal Medicine at <http://www.annals.org/>, and Epidemiology at <http://www.epidem.com/>). Information on the STROBE Initiative is available at [www.strobe-statement.org](http://www.strobe-statement.org).
